# Supplementary material for: Greater Combined Reductions of HbA1c ≥ 1.0% and Body Weight Loss ≥ 5.0% or ≥ 10.0% with Orally Administered Semaglutide Versus Comparators
Source: PubMed Central journal article supplement — Diabetes Ther. 2023 May 31;14(8):1415–25. doi: 10.1007/s13300-023-01413-5 (PMC10299987; doi:10.1007/s13300-023-01413-5), 2023-05-31
Supplement: 13300_2023_1413_MOESM1_ESM.pdf [file 13300_2023_1413_MOESM1_ESM.pdf]

## Supplementary Material

### **Greater Combined Reductions of HbA<sub>1c</sub> ≥ 1.0% and Body Weight Loss ≥ 5.0% or ≥ 10.0% with Orally Administered Semaglutide Versus Comparators**

Kathleen M. Dungan<sup>a</sup>, Lars Bardtrum<sup>b</sup>, Erik Christiansen<sup>b</sup>, Johanna Eliasson<sup>b</sup>, Linda Mellbin<sup>c</sup>, Vincent C. Woo<sup>d</sup>, Tina Vilsbøll<sup>e</sup>

<sup>a</sup>Division of Endocrinology, Diabetes and Metabolism, The Ohio State University, Columbus, OH, USA; <sup>b</sup>Novo Nordisk A/S, Søborg, Denmark; <sup>c</sup>Department of Medicine, Solna, Karolinska Institutet, Stockholm, Sweden; <sup>d</sup>Section of Endocrinology and Metabolism, University of Manitoba, Winnipeg, MB, Canada; <sup>e</sup>Clinical Research, Steno Diabetes Center Copenhagen, University of Copenhagen, Herlev, Denmark

**Corresponding author:** Kathleen M. Dungan, Division of Endocrinology, Diabetes and Metabolism, The Ohio State University, 1581 Dodd Drive, Columbus, OH 43210, USA

*E-mail:* kathleen.dungan@osumc.edu

**Supplementary Table S1** Patient demographics and clinical characteristics at baseline in the PIONEER 1–5 and 8 trials

|                                                      | PIONEER 1 [1]                |                | PIONEER 2 [2]                |                        | PIONEER 3 [3]                |                       | PIONEER 4 [4]                |                       |                | PIONEER 5 [5]                |                | PIONEER 8 [6]                |                |
|------------------------------------------------------|------------------------------|----------------|------------------------------|------------------------|------------------------------|-----------------------|------------------------------|-----------------------|----------------|------------------------------|----------------|------------------------------|----------------|
|                                                      | Oral<br>semaglutide<br>14 mg | Placebo        | Oral<br>semaglutide<br>14 mg | Empagliflozin<br>25 mg | Oral<br>semaglutide<br>14 mg | Sitagliptin<br>100 mg | Oral<br>semaglutide<br>14 mg | Liraglutide<br>1.8 mg | Placebo        | Oral<br>semaglutide<br>14 mg | Placebo        | Oral<br>semaglutide<br>14 mg | Placebo        |
| People, <i>n</i>                                     | 175                          | 178            | 411                          | 410                    | 465                          | 467                   | 285                          | 284                   | 142            | 163                          | 161            | 181                          | 184            |
| Mean (SD) age, years                                 | 54<br>(11)                   | 54<br>(11)     | 57<br>(10)                   | 58<br>(10)             | 57<br>(10)                   | 58<br>(10)            | 56<br>(10)                   | 56<br>(10)            | 57<br>(10)     | 71<br>(8)                    | 70<br>(8)      | 61<br>(10)                   | 60<br>(10)     |
| Mean (SD) duration of diabetes, years                | 3.4<br>(4.4)                 | 3.4<br>(4.6)   | 7.2<br>(5.8)                 | 7.7<br>(6.3)           | 8.7<br>(6.1)                 | 8.8<br>(6.0)          | 7.8<br>(5.7)                 | 7.3<br>(5.3)          | 7.8<br>(5.5)   | 14.1<br>(8.6)                | 13.9<br>(7.4)  | 14.1<br>(8.0)                | 14.8<br>(7.9)  |
| Mean (SD) HbA <sub>1c</sub> , %                      | 8.0<br>(0.7)                 | 7.9<br>(0.7)   | 8.1<br>(0.9)                 | 8.1<br>(0.9)           | 8.3<br>(0.9)                 | 8.3<br>(0.9)          | 8.0<br>(0.7)                 | 8.0<br>(0.7)          | 7.9<br>(0.7)   | 8.0<br>(0.7)                 | 7.9<br>(0.7)   | 8.2<br>(0.7)                 | 8.2<br>(0.7)   |
| Mean (SD) HbA <sub>1c</sub> , mmol/mol               | 64<br>(8)                    | 63<br>(7)      | 65<br>(10)                   | 65<br>(10)             | 67<br>(10)                   | 67<br>(10)            | 64<br>(8)                    | 64<br>(7)             | 63<br>(8)      | 64<br>(8)                    | 63<br>(8)      | 66<br>(8)                    | 66<br>(8)      |
| Mean (SD) body weight, kg                            | 88.1<br>(22.1)               | 88.6<br>(23.4) | 91.9<br>(20.5)               | 91.3<br>(20.1)         | 91.2<br>(21.7)               | 90.9<br>(21.0)        | 92.9<br>(20.6)               | 95.5<br>(21.9)        | 93.2<br>(20.0) | 91.3<br>(17.8)               | 90.4<br>(17.5) | 84.6<br>(21.0)               | 86.0<br>(21.4) |
| Background medication at randomisation, <i>n</i> (%) |                              |                |                              |                        |                              |                       |                              |                       |                |                              |                |                              |                |
| Metformin                                            | –                            | –              | 411<br>(100.0)               | 410<br>(100.0)         | 465<br>(100.0)               | 467<br>(100.0)        | 285<br>(100)                 | 284<br>(100)          | 142<br>(100)   | 132<br>(81.0)                | 110<br>(68.3)  | 121<br>(66.9)                | 125<br>(67.9)  |
| Sulphonylureas                                       | –                            | –              | –                            | –                      | 220<br>(47.3)                | 219<br>(46.9)         | –                            | –                     | –              | 65<br>(39.9)                 | 66<br>(41.0)   | –                            | –              |
| SGLT2i                                               | –                            | –              | –                            | –                      | –                            | –                     | 74<br>(26.0)                 | 73<br>(25.7)          | 36<br>(25.4)   | –                            | –              | –                            | –              |
| Insulin                                              |                              |                |                              |                        |                              |                       |                              |                       |                |                              |                |                              |                |
| Long-acting (basal)                                  | –                            | –              | –                            | –                      | –                            | –                     | –                            | –                     | –              | 45<br>(27.6)                 | 43<br>(26.7)   | 74<br>(40.9)                 | 81<br>(44.0)   |
| Intermediate-acting                                  | –                            | –              | –                            | –                      | –                            | –                     | –                            | –                     | –              | 13<br>(8.0)                  | 11<br>(6.8)    | 0                            | 0              |
| Fast-acting (bolus)                                  | –                            | –              | –                            | –                      | –                            | –                     | –                            | –                     | –              | 0                            | 1<br>(0.6)     | 0                            | 0              |
| Pre-mixed                                            | –                            | –              | –                            | –                      | –                            | –                     | –                            | –                     | –              | 1<br>(0.6)                   | 0              | 32<br>(17.7)                 | 30<br>(16.3)   |
| Basal + bolus                                        | –                            | –              | –                            | –                      | –                            | –                     | –                            | –                     | –              | –                            | –              | 68<br>(37.6)                 | 66<br>(35.9)   |
| Other                                                | –                            | –              | –                            | –                      | –                            | 1<br>(0.2)            | –                            | –                     | –              | 0                            | 1<br>(0.6)     | –                            | –              |

|                                                                    | PIONEER 1 [1]                |              | PIONEER 2 [2]                |                        | PIONEER 3 [3]                |                       | PIONEER 4 [4]                |                       |              | PIONEER 5 [5]                |               | PIONEER 8 [6]                |               |
|--------------------------------------------------------------------|------------------------------|--------------|------------------------------|------------------------|------------------------------|-----------------------|------------------------------|-----------------------|--------------|------------------------------|---------------|------------------------------|---------------|
|                                                                    | Oral<br>semaglutide<br>14 mg | Placebo      | Oral<br>semaglutide<br>14 mg | Empagliflozin<br>25 mg | Oral<br>semaglutide<br>14 mg | Sitagliptin<br>100 mg | Oral<br>semaglutide<br>14 mg | Liraglutide<br>1.8 mg | Placebo      | Oral<br>semaglutide<br>14 mg | Placebo       | Oral<br>semaglutide<br>14 mg | Placebo       |
| Comorbidities affecting ≥ 20% of people in any trial, <i>n</i> (%) |                              |              |                              |                        |                              |                       |                              |                       |              |                              |               |                              |               |
| Hypertension                                                       | 90<br>(51.4)                 | 98<br>(55.1) | 298<br>(72.5)                | 305<br>(74.4)          | 357<br>(76.8)                | 339<br>(72.6)         | 222<br>(77.9)                | 215<br>(75.7)         | 97<br>(68.3) | 154<br>(94.5)                | 153<br>(95.0) | 138<br>(76.2)                | 147<br>(79.9) |
| Dyslipidaemia                                                      | 54<br>(30.9)                 | 44<br>(24.7) | 97<br>(23.6)                 | 95<br>(23.2)           | 136<br>(29.2)                | 141<br>(30.2)         | 54<br>(18.9)                 | 74<br>(26.1)          | 36<br>(25.4) | 42<br>(25.8)                 | 51<br>(31.7)  | 75<br>(41.4)                 | 67<br>(36.4)  |
| Obesity<br>(> 30 kg/m <sup>2</sup> )                               | 38<br>(21.7)                 | 41<br>(23.0) | 108<br>(26.3)                | 117<br>(28.5)          | 119<br>(25.6)                | 133<br>(28.5)         | 72<br>(25.3)                 | 68<br>(23.9)          | 42<br>(29.6) | 63<br>(38.7)                 | 67<br>(41.6)  | 26<br>(14.4)                 | 35<br>(19.0)  |
| Diabetic<br>neuropathy                                             | 14<br>(8.0)                  | 9<br>(5.1)   | 53<br>(12.9)                 | 64<br>(15.6)           | 115<br>(24.7)                | 129<br>(27.6)         | 52<br>(18.2)                 | 53<br>(18.7)          | 32<br>(22.5) | 80<br>(49.1)                 | 81<br>(50.3)  | 61<br>(33.7)                 | 62<br>(34.9)  |
| Diabetic<br>retinopathy                                            | 14<br>(8.0)                  | 8<br>(4.5)   | 32<br>(7.8)                  | 46<br>(11.2)           | 74<br>(15.9)                 | 81<br>(17.3)          | 28<br>(9.8)                  | 25<br>(8.8)           | 14<br>(9.9)  | 67<br>(41.1)                 | 57<br>(35.4)  | 62<br>(34.3)                 | 60<br>(32.6)  |
| Diabetic<br>nephropathy                                            | 9<br>(5.1)                   | 6<br>(3.4)   | 17<br>(4.1)                  | 15<br>(3.7)            | 52<br>(11.2)                 | 40<br>(8.6)           | 23<br>(8.1)                  | 21<br>(7.4)           | 14<br>(9.9)  | 133<br>(81.6)                | 131<br>(81.4) | 30<br>(16.6)                 | 38<br>(20.7)  |
| Hyperlipidaemia                                                    | 29<br>(16.6)                 | 33<br>(18.5) | 111<br>(27.0)                | 113<br>(27.6)          | 94<br>(20.2)                 | 102<br>(21.8)         | 106<br>(37.2)                | 94<br>(33.1)          | 49<br>(34.5) | 34<br>(20.9)                 | 36<br>(22.4)  | 32<br>(17.7)                 | 33<br>(17.9)  |
| Ischaemic heart<br>disease                                         | 14<br>(8.0)                  | 15<br>(8.4)  | 57<br>(13.9)                 | 46<br>(11.2)           | 77<br>(16.6)                 | 81<br>(17.3)          | 38<br>(13.3)                 | 32<br>(11.3)          | 12<br>(8.5)  | 75<br>(46.0)                 | 69<br>(42.9)  | 35<br>(19.3)                 | 37<br>(20.1)  |
| Heart failure                                                      | 4<br>(2.3)                   | 5<br>(2.8)   | 22<br>(5.4)                  | 16<br>(3.9)            | 41<br>(8.8)                  | 42<br>(9.0)           | 19<br>(6.7)                  | 17<br>(6.0)           | 3<br>(2.1)   | 56<br>(34.4)                 | 61<br>(37.9)  | 12<br>(6.6)                  | 10<br>(5.4)   |
| Osteoarthritis                                                     | 13<br>(7.4)                  | 19<br>(10.7) | 65<br>(15.8)                 | 58<br>(14.1)           | 74<br>(15.9)                 | 59<br>(12.6)          | 32<br>(11.2)                 | 43<br>(15.1)          | 12<br>(8.5)  | 37<br>(22.7)                 | 46<br>(28.6)  | 29<br>(16.0)                 | 25<br>(13.6)  |
| Cataract                                                           | 9<br>(5.1)                   | 11<br>(6.2)  | 22<br>(5.4)                  | 27<br>(6.6)            | 54<br>(11.6)                 | 45<br>(9.6)           | 13<br>(4.6)                  | 21<br>(7.4)           | 13<br>(9.2)  | 51<br>(31.3)                 | 55<br>(34.2)  | 26<br>(14.4)                 | 22<br>(12.0)  |
| Cholelithiasis                                                     | 11<br>(6.3)                  | 9<br>(5.1)   | 55<br>(13.4)                 | 50<br>(12.2)           | 56<br>(12.0)                 | 57<br>(12.2)          | 34<br>(11.9)                 | 35<br>(12.3)          | 20<br>(14.1) | 34<br>(20.9)                 | 22<br>(13.7)  | 27<br>(14.9)                 | 19<br>(10.3)  |
| Gastro-<br>oesophageal<br>reflux disease                           | 14<br>(8.0)                  | 20<br>(11.2) | 44<br>(10.7)                 | 43<br>(10.5)           | 73<br>(15.7)                 | 79<br>(16.9)          | 39<br>(13.7)                 | 44<br>(15.5)          | 18<br>(12.7) | 34<br>(20.9)                 | 31<br>(19.3)  | 36<br>(19.9)                 | 29<br>(15.8)  |

*HbA<sub>1c</sub>* glycated haemoglobin, *SD* standard deviation, *SGLT2i* sodium-glucose co-transporter 2 inhibitor

## References

1. Aroda VR, Rosenstock J, Terauchi Y, et al. PIONEER 1: randomized clinical trial of the efficacy and safety of oral semaglutide monotherapy in comparison with placebo in patients with type 2 diabetes. *Diabetes Care*. 2019;42:1724–32.
2. Rodbard HW, Rosenstock J, Canani LH, et al. Oral semaglutide versus empagliflozin in patients with type 2 diabetes uncontrolled on metformin: the PIONEER 2 trial. *Diabetes Care*. 2019;42:2272–81.
3. Rosenstock J, Allison D, Birkenfeld AL, et al. Effect of additional oral semaglutide vs sitagliptin on glycated hemoglobin in adults with type 2 diabetes uncontrolled with metformin alone or with sulfonylurea: the PIONEER 3 randomized clinical trial. *JAMA*. 2019;321:1466–80.
4. Pratley R, Amod A, Hoff ST, et al. Oral semaglutide versus subcutaneous liraglutide and placebo in type 2 diabetes (PIONEER 4): a randomised, double-blind, phase 3a trial. *Lancet*. 2019;394:39–50.
5. Mosenzon O, Blicher TM, Rosenlund S, et al. Efficacy and safety of oral semaglutide in patients with type 2 diabetes and moderate renal impairment (PIONEER 5): a placebo-controlled, randomised, phase 3a trial. *Lancet Diabetes Endocrinol*. 2019;7:515–27.
6. Zinman B, Aroda VR, Buse JB, et al. Efficacy, safety, and tolerability of oral semaglutide versus placebo added to insulin with or without metformin in patients with type 2 diabetes: the PIONEER 8 trial. *Diabetes Care*. 2019;42:2262–71.
